# Supplementary material
Source: PubMed Central journal article supplement (PMC5901958)

**Supplemental Figure 1. Social Science Methods**

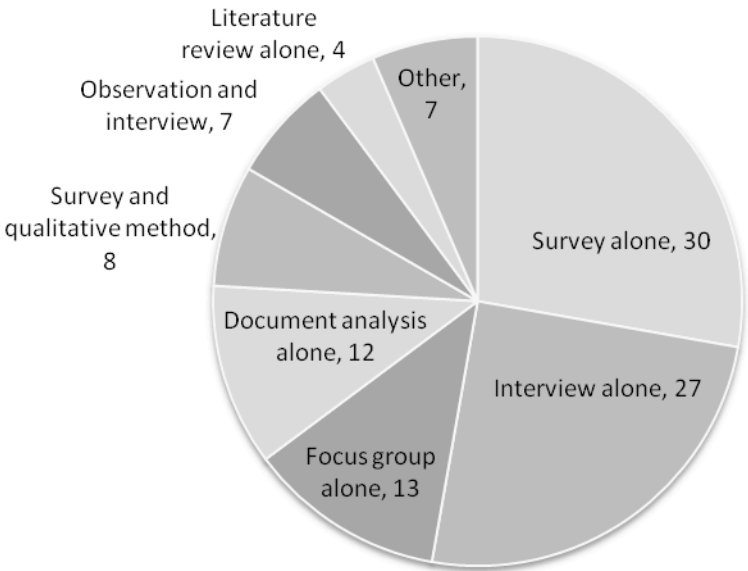

Supplement: NIHMS387465-supplement-S1.pdf [file NIHMS387465-supplement-S1.pdf]
